# Supplementary material for: Integrated Analysis of mRNA Expression, CpG Island Methylation, and Polymorphisms in the MITF Gene in Ducks (Anas platyrhynchos)
Source: PubMed Central journal article supplement (PMC6778931; doi:10.1155/2019/8512467), 2019-09-23
Supplement: 8512467.f1.pdf [file 8512467.f1.pdf]

## Supplementary Materials

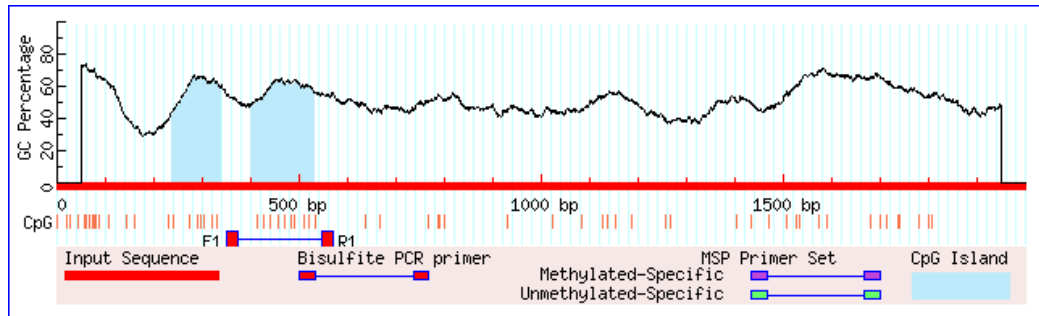

**Supplementary Figure 1: Bioinformatics analysis of the CpG island of duck *MITF* gene.** The blue region is the CpG island.

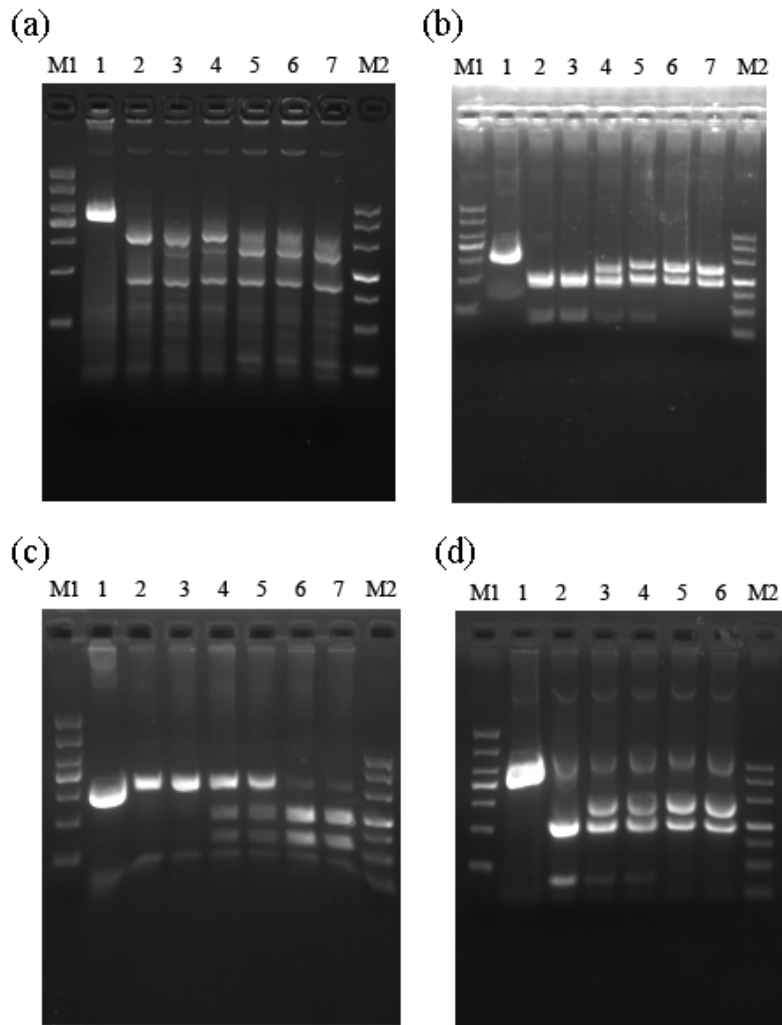

**Supplementary Figure 2: PCR-RFLP genotyping patterns of four SNPs in duck *MITF* gene.**

(a) PCR-*HaeII*-RFLP analysis for the g.312C>T site; the PCR products were digested with the *HaeII* enzyme and cleaved into 60-, 168-, and 257-bp fragments for the C allele and 168- and 317-bp fragments for the T allele. Lane 1, PCR product; lane 2, TT genotype; lanes 3 to 4, CT genotype; lanes 5 to 7, CC genotype. (b) PCR-*HaeIII*-RFLP analysis for the g.32813G>A site; the digestion of a 457-bp DNA fragment with the *HaeIII* enzyme produced fragments of 75-, 184-, and 198- bp for the G allele and fragments of 198- and 259- bp for the A allele. Lane 1, PCR product; lanes 2 to 3, GG genotype; lanes 4 to 5, GA genotype; lanes 6 to 7, AA genotype. (c) PCR-*ApoI*-RFLP analysis for the g.39807T>G site; a 329-bp fragment for the G allele and 128-

and 201-bp fragments for the T allele when digested with the *ApoI* enzyme. Lane 1, PCR product; lanes 2 to 3, GG genotype; lanes 4 to 5, TG genotype; lanes 6 to 7 TT genotype. (d)

PCR-*HinfI*-RFLP analysis for the g.40862G>A site; the digestion of the PCR product with the *HinfI* enzyme resulted in fragments of 223- and 317- bp for the G allele and fragments of 80-, 223-, and 237- bp for the A allele. Lane 1, PCR product; lane 2, AA genotype; lanes 3 to 4, GA genotype; lanes 5 to 6, GG genotype. M1, DL1000 DNA marker; M2: DL500 DNA marker.

**Supplementary Table 1: Primer pairs used for identifying the polymorphisms of *MITF* gene**

| Primer name | Primer sequence (5'-3') | Product size (bp) | T <sub>m</sub> (°C) |
|-------------|-------------------------|-------------------|---------------------|
| GF1         | TTCTCGTGGATGGTGGCTGTAT  | 1140              | 57.1                |
| GR1         | TTATGTGGACTTACCCTGTGC   |                   |                     |
| GF2         | AGCCCTTTCCTAACTCCT      | 568               | 56.6                |
| GR2         | CAACTATTCACTGCGTGCATCA  |                   |                     |
| GF3         | TTGTACGGGCACCGATAT      | 457               | 52.6                |
| GR3         | CTTGAGGAGCAGCGATTA      |                   |                     |
| GF4         | TGAATAAGCCACTCCGTCTA    | 1229              | 54.5                |
| GR4         | CAAACACTTCTACTGCCACA    |                   |                     |
| GF5         | TCGCCCAGACAGCAAGTAATA   | 1090              | 55.2                |
| GR5         | TAAGGAAACCCACAAGCAAAA   |                   |                     |
| GF6         | TCGTGTCTGGGTAGGTTC      | 880               | 56.3                |
| GR6         | TTGGAGGCATTGGTAGTT      |                   |                     |
